# Supplementary material for: Association of FGFR3 and FGFR4 gene polymorphisms with breast cancer in Chinese women of Heilongjiang province
Source: PubMed Central journal article supplement (PMC4741823; doi:10.18632/oncotarget.5850), 2015-09-27
Supplement: oncotarget-06-34023-s001.pdf [file oncotarget-06-34023-s001.pdf]

## Association of *FGFR3* and *FGFR4* gene polymorphisms with breast cancer in Chinese women of Heilongjiang province

### Supplementary Material

**Supplement Table1. Stratified analysis between *FGFR3* and *FGFR4* SNPs and breast cancer risk by age, BMI, age at menarche and menopausal status**

|           | Age               |                    |                       |                   |                     |                       | BMI               |                    |                       |                   |                     |                       |
|-----------|-------------------|--------------------|-----------------------|-------------------|---------------------|-----------------------|-------------------|--------------------|-----------------------|-------------------|---------------------|-----------------------|
|           | ≤50               |                    |                       | >50               |                     |                       | ≤23               |                    |                       | >23               |                     |                       |
|           | Case/<br>controls | OR(95%CI)          | <i>P</i> <sup>a</sup> | Case/<br>controls | OR(95%CI)           | <i>P</i> <sup>a</sup> | Case/<br>controls | OR(95%CI)          | <i>P</i> <sup>a</sup> | Case/<br>controls | OR(95%CI)           | <i>P</i> <sup>a</sup> |
| rs2234909 |                   |                    |                       |                   |                     |                       |                   |                    |                       |                   |                     |                       |
| TT        | 372/363           | 1.000              |                       | 300/275           | 1.000               |                       | 265/292           | 1.000              |                       | 407/346           | 1.000               |                       |
| TC        | 39/42             | 0.933(0.588-1.480) | 0.767                 | 32/35             | 0.872(0.514-1.481)  | 0.613                 | 23/44             | 0.577(0.338-0.986) | 0.044                 | 48/33             | 1.273(0.794-2.041)  | 0.317                 |
| CC        | 2/0               | (-)                | 0.999                 | 2/1               | 1.517(0.136-16.883) | 0.735                 |                   |                    |                       | 4/1               | 4.192(0.460-38.218) | 0.204                 |
| TC+CC     | 41/42             | 0.978(0.619-1.544) | 0.924                 | 34/36             | 0.894(0.533-1.501)  | 0.672                 | 23/44             | 0.577(0.338-0.986) | 0.044                 | 52/34             | 1.352(0.852-2.146)  | 0.200                 |
| rs3135848 |                   |                    |                       |                   |                     |                       |                   |                    |                       |                   |                     |                       |
| TT        | 314/326           | 1.000              |                       | 262/227           | 1.000               |                       | 218/259           | 1.000              |                       | 358/294           | 1.000               |                       |
| TC        | 94/75             | 1.285(0.911-1.812) | 0.153                 | 63/80             | 0.668(0.453-0.985)  | 0.042                 | 66/73             | 1.059(0.722-1.553) | 0.769                 | 91/82             | 0.921(0.656-1.294)  | 0.635                 |
| CC        | 5/4               | 1.305(0.342-4.982) | 0.697                 | 9/4               | 1.645(0.467-5.795)  | 0.439                 | 4/4               | 1.211(0.295-4.978) | 0.791                 | 10/4              | 1.863(0.571-6.083)  | 0.303                 |
| TC+CC     | 99/79             | 1.286(0.918-1.801) | 0.144                 | 72/84             | 0.714(0.490-1.041)  | 0.080                 | 70/77             | 1.067(0.734-1.551) | 0.735                 | 101/86            | 0.967(0.695-1.345)  | 0.841                 |
| rs1966265 |                   |                    |                       |                   |                     |                       |                   |                    |                       |                   |                     |                       |
| AA        | 82/119            | 1.000              |                       | 86/107            | 1.000               |                       | 60/102            | 1.000              |                       | 108/124           | 1.000               |                       |
| AG        | 226/214           | 1.588(1.129-2.235) | 0.008                 | 182/150           | 1.625(1.121-2.355)  | 0.010                 | 169/173           | 1.746(1.183-2.576) | 0.005                 | 239/191           | 1.492(1.078-2.065)  | 0.016                 |
| GG        | 105/72            | 2.142(1.416-3.241) | <0.001                | 66/54             | 1.525(0.947-2.455)  | 0.083                 | 59/61             | 1.771(1.089-2.882) | 0.021                 | 112/65            | 2.029(1.352-3.044)  | 0.001                 |
| AG+GG     | 331/286           | 1.731(1.249-2.399) | 0.001                 | 248/204           | 1.597(1.123-2.272)  | 0.009                 | 228/234           | 1.752(1.206-2.546) | 0.003                 | 351/256           | 1.629(1.196-2.218)  | 0.002                 |
| rs351855  |                   |                    |                       |                   |                     |                       |                   |                    |                       |                   |                     |                       |
| GG        | 107/149           | 1.000              |                       | 98/121            | 1.000               |                       | 78/123            | 1.000              |                       | 127/147           | 1.000               |                       |
| GA        | 216/202           | 1.514(1.103-2.079) | 0.010                 | 188/146           | 1.651(1.156-2.357)  | 0.006                 | 164/165           | 1.602(1.116-2.299) | 0.011                 | 240/183           | 1.547(1.135-2.109)  | 0.006                 |

|       |         |                    |        |         |                    |       |         |                    |       |         |                    |        |
|-------|---------|--------------------|--------|---------|--------------------|-------|---------|--------------------|-------|---------|--------------------|--------|
| AA    | 90/54   | 2.312(1.517-3.524) | <0.001 | 48/44   | 1.335(0.803-2.218) | 0.265 | 46/48   | 1.586(0.962-2.616) | 0.070 | 92/50   | 2.187(1.430-3.344) | <0.001 |
| GA+AA | 306/256 | 1.686(1.248-2.279) | 0.001  | 236/190 | 1.577(1.122-2.216) | 0.009 | 210/213 | 1.599(1.130-2.260) | 0.008 | 332/233 | 1.683(1.253-2.260) | 0.001  |

---

Continued

|           | Age at menarche   |                    |                       |                   |                     |                       | Menopausal status |                    |                       |                   |                     |                       |
|-----------|-------------------|--------------------|-----------------------|-------------------|---------------------|-----------------------|-------------------|--------------------|-----------------------|-------------------|---------------------|-----------------------|
|           | ≤15               |                    |                       | >15               |                     |                       | Pre-menopausal    |                    |                       | Post-menopausal   |                     |                       |
|           | Case/<br>controls | OR(95%CI)          | <i>P</i> <sup>a</sup> | Case/<br>controls | OR(95%CI)           | <i>P</i> <sup>a</sup> | Case/<br>controls | OR(95%CI)          | <i>P</i> <sup>a</sup> | Case/<br>controls | OR(95%CI)           | <i>P</i> <sup>a</sup> |
| rs2234909 |                   |                    |                       |                   |                     |                       |                   |                    |                       |                   |                     |                       |
| TT        | 369/335           | 1.000              |                       | 303/303           | 1.000               |                       | 372/409           | 1.000              |                       | 300/229           | 1.000               |                       |
| TC        | 30/35             | 0.757(0.451-1.270) | 0.291                 | 41/42             | 1.045(0.654-1.670)  | 0.853                 | 41/48             | 0.945(0.607-1.472) | 0.804                 | 30/29             | 0.833(0.477-1.453)  | 0.519                 |
| CC        |                   |                    |                       | 4/1               | 3.911(0.431-35.480) | 0.225                 | 2/0               |                    |                       | 2/1               | 1.712(0.153-19.195) | 0.663                 |
| TC+CC     | 30/35             | 0.757(0.451-1.270) | 0.291                 | 45/43             | 1.118(0.708-1.764)  | 0.633                 | 43/48             | 0.991(0.640-1.535) | 0.968                 | 32/30             | 0.863(0.501-1.486)  | 0.594                 |
| rs3135848 |                   |                    |                       |                   |                     |                       |                   |                    |                       |                   |                     |                       |
| TT        | 310/285           | 1.000              |                       | 266/268           | 1.000               |                       | 319/363           | 1.000              |                       | 257/190           | 1.000               |                       |
| TC        | 79/78             | 0.911(0.638-1.301) | 0.609                 | 78/77             | 1.023(0.710-1.474)  | 0.903                 | 91/88             | 1.198(0.860-1.669) | 0.285                 | 66/67             | 0.700(0.469-1.043)  | 0.080                 |
| CC        | 10/7              | 1.134(0.416-3.088) | 0.806                 | 4/1               | 6.199(0.619-62.111) | 0.121                 | 5/6               | 1.082(0.325-3.608) | 0.898                 | 9/2               | 2.543(0.511-12.667) | 0.254                 |
| TC+CC     | 89/85             | 0.930(0.660-1.311) | 0.678                 | 82/78             | 1.072(0.747-1.538)  | 0.706                 | 96/94             | 1.191(0.861-1.647) | 0.290                 | 75/69             | 0.756(0.512-1.115)  | 0.158                 |
| rs1966265 |                   |                    |                       |                   |                     |                       |                   |                    |                       |                   |                     |                       |
| AA        | 84/110            | 1.000              |                       | 84/116            | 1.000               |                       | 86/130            | 1.000              |                       | 82/96             | 1.000               |                       |
| AG        | 221/190           | 1.638(1.153-2.327) | 0.006                 | 187/174           | 1.596(1.116-2.284)  | 0.010                 | 231/241           | 1.485(1.068-2.065) | 0.019                 | 177/123           | 1.828(1.242-2.693)  | 0.002                 |
| GG        | 94/70             | 1.865(1.216-2.861) | 0.004                 | 77/56             | 1.947(1.235-3.069)  | 0.004                 | 98/86             | 1.749(1.172-2.608) | 0.006                 | 73/40             | 2.136(1.296-3.519)  | 0.003                 |
| AG+GG     | 315/260           | 1.700(1.216-2.377) | 0.002                 | 264/230           | 1.684(1.197-2.368)  | 0.003                 | 329/327           | 1.555(1.135-2.131) | 0.006                 | 250/163           | 1.907(1.321-2.752)  | 0.001                 |
| rs351855  |                   |                    |                       |                   |                     |                       |                   |                    |                       |                   |                     |                       |
| GG        | 101/137           | 1.000              |                       | 104/133           | 1.000               |                       | 110/163           | 1.000              |                       | 95/107            | 1.000               |                       |
| GA        | 221/180           | 1.742(1.253-2.422) | 0.001                 | 183/168           | 1.451(1.034-2.036)  | 0.031                 | 221/229           | 1.456(1.071-1.980) | 0.016                 | 183/119           | 1.814(1.250-2.631)  | 0.002                 |
| AA        | 77/53             | 2.075(1.335-3.227) | 0.001                 | 61/45             | 1.759(1.095-2.825)  | 0.020                 | 84/65             | 1.935(1.290-2.905) | 0.001                 | 54/33             | 1.798(1.060-3.050)  | 0.030                 |
| GA+AA     | 298/233           | 1.817(1.326-2.490) | <0.001                | 244/213           | 1.516(1.097-2.094)  | 0.012                 | 305/294           | 1.564(1.168-2.095) | 0.003                 | 237/152           | 1.810(1.270-2.580)  | 0.001                 |

<sup>a</sup>Adjusted for age, BMI, age at menarche, and menopausal status (excluded the stratified factor in each stratum).

**SNP: rs2234909 in *FGFR3***

| Patient disease characteristics |                 | n   | Phenotype per genotype |       |        | P, three groups† | P, two groups‡ |
|---------------------------------|-----------------|-----|------------------------|-------|--------|------------------|----------------|
|                                 |                 |     | AA                     | AB    | BB     |                  |                |
| Genotype(number of patients)    |                 | 747 | 672                    | 71    | 4      |                  |                |
| Clinic stage(UICC)              | 0               | 675 | 4.8%                   | .0%   | .0%    | 0.323            | 0.194          |
|                                 | 1               |     | 43.5%                  | 54.0% | 33.3%  |                  |                |
|                                 | 2               |     | 30.2%                  | 27.0% | 66.7%  |                  |                |
|                                 | 3-4             |     | 21.5%                  | 19.0% | .0%    |                  |                |
| Tumor size(cm)                  | ≤2              | 671 | 86.8%                  | 87.3% | 100.0% | 0.791            | 0.801          |
|                                 | >2              |     | 13.2%                  | 12.7% | .0%    |                  |                |
| Bloom-Richardson grade          | 1               | 566 | 7.5%                   | 5.7%  | .0%    | 0.761            | 0.825          |
|                                 | 2               |     | 71.3%                  | 71.7% | 100.0% |                  |                |
|                                 | 3               |     | 21.2%                  | 22.6% | .0%    |                  |                |
| LN involvement (%)              |                 | 719 | 41.5%                  | 34.8% | 50.0%  | 0.523            | 0.334          |
| ER positive (%)                 |                 | 691 | 65.3%                  | 56.9% | 100.0% | 0.136            | 0.334          |
| PR positive (%)                 |                 | 691 | 54.0%                  | 52.3% | 50.0%  | 0.954            | 0.770          |
| HER2 positive (%)               |                 | 611 | 19.1%                  | 22.4% | 25.0%  | 0.803            | 0.515          |
| Ki67 positive (%)               |                 | 686 | 61.4%                  | 72.3% | 50.0%  | 0.199            | 0.119          |
| P53 positive (%)                |                 | 684 | 26.5%                  | 32.3% | 25.0%  | 0.603            | 0.340          |
| Intrinsic subtypes              | Luminal A       | 611 | 24.6%                  | 22.4% | 25.0%  | 0.828            | 0.959          |
|                                 | Luminal B       |     | 44.8%                  | 41.4% | 75.0%  |                  |                |
|                                 | HER2 positive   |     | 26.2%                  | 31.0% | .0%    |                  |                |
|                                 | Triple negative |     | 4.4%                   | 5.2%  | .0%    |                  |                |

**SNP: rs3135848 in *FGFR3***

| Patient disease characteristics |                 | n   | Phenotype per genotype |       |       | P, three groups <sup>†</sup> | P, two groups <sup>‡</sup> |
|---------------------------------|-----------------|-----|------------------------|-------|-------|------------------------------|----------------------------|
|                                 |                 |     | AA                     | AB    | BB    |                              |                            |
| Genotype(number of patients)    |                 | 747 | 576                    | 157   | 14    |                              |                            |
| Clinic stage(UICC)              | 0               | 675 | 4.2%                   | 5.2%  | .0%   | 0.285                        | 0.903                      |
|                                 | 1               |     | 44.1%                  | 48.1% | 16.7% |                              |                            |
|                                 | 2               |     | 29.9%                  | 29.6% | 41.7% |                              |                            |
|                                 | 3-4             |     | 21.8%                  | 17.0% | 41.7% |                              |                            |
| Tumor size(cm)                  | ≤2              | 671 | 86.9%                  | 88.1% | 75.0% | 0.438                        | 0.967                      |
|                                 | >2              |     | 13.1%                  | 11.9% | 25.0% |                              |                            |
| Bloom-Richardson grade          | 1               | 566 | 6.8%                   | 9.2%  | 7.7%  | 0.203                        | 0.456                      |
|                                 | 2               |     | 72.7%                  | 69.7% | 46.2% |                              |                            |
|                                 | 3               |     | 20.5%                  | 21.1% | 46.2% |                              |                            |
| LN involvement (%)              |                 | 719 | 41.7%                  | 35.1% | 71.4% | 0.023                        | 0.441                      |
| ER positive (%)                 |                 | 691 | 64.3%                  | 64.8% | 78.6% | 0.544                        | 0.691                      |
| PR positive (%)                 |                 | 691 | 53.5%                  | 54.9% | 57.1% | 0.923                        | 0.713                      |
| HER2 positive (%)               |                 | 611 | 19.4%                  | 19.7% | 21.4% | 0.980                        | 0.900                      |
| Ki67 positive (%)               |                 | 686 | 63.9%                  | 55.7% | 71.4% | 0.160                        | 0.127                      |
| P53 positive (%)                |                 | 684 | 26.4%                  | 28.6% | 35.7% | 0.669                        | 0.490                      |
| Intrinsic subtypes              | Luminal A       | 611 | 23.4%                  | 29.5% | 14.3% | 0.503                        | 0.667                      |
|                                 | Luminal B       |     | 45.5%                  | 39.3% | 64.3% |                              |                            |
|                                 | HER2 positive   |     | 26.9%                  | 26.2% | 14.3% |                              |                            |
|                                 | Triple negative |     | 4.2%                   | 4.9%  | 7.1%  |                              |                            |

**SNP: rs1966265 in *FGFR4***

| Patient disease characteristics |                 | n   | Phenotype per genotype |       |       | P, three groups <sup>†</sup> | P, two groups <sup>‡</sup> |
|---------------------------------|-----------------|-----|------------------------|-------|-------|------------------------------|----------------------------|
|                                 |                 |     | AA                     | AB    | BB    |                              |                            |
| Genotype(number of patients)    |                 | 747 | 168                    | 408   | 171   |                              |                            |
| Clinic stage(UICC)              | 0               | 675 | 3.2%                   | 5.2%  | 3.3%  | 0.212                        | 0.763                      |
|                                 | 1               |     | 47.4%                  | 44.8% | 40.5% |                              |                            |
|                                 | 2               |     | 29.5%                  | 31.4% | 27.5% |                              |                            |
|                                 | 3-4             |     | 19.9%                  | 18.6% | 28.8% |                              |                            |
| Tumor size(cm)                  | ≤2              | 671 | 87.8%                  | 86.8% | 86.2% | 0.910                        | 0.693                      |
|                                 | >2              |     | 12.2%                  | 13.2% | 13.8% |                              |                            |
| Bloom-Richardson grade          | 1               | 566 | 7.5%                   | 7.6%  | 6.2%  | 0.801                        | 0.981                      |
|                                 | 2               |     | 70.9%                  | 70.0% | 76.0% |                              |                            |
|                                 | 3               |     | 21.6%                  | 22.4% | 17.8% |                              |                            |
| LN involvement (%)              |                 | 719 | 35.4%                  | 39.9% | 48.8% | 0.041                        | 0.101                      |
| ER positive (%)                 |                 | 691 | 63.1%                  | 64.6% | 66.7% | 0.800                        | 0.627                      |
| PR positive (%)                 |                 | 691 | 52.2%                  | 52.5% | 58.8% | 0.373                        | 0.646                      |
| HER2 positive (%)               |                 | 611 | 20.4%                  | 17.6% | 23.1% | 0.374                        | 0.745                      |
| Ki67 positive (%)               |                 | 686 | 58.7%                  | 62.8% | 65.1% | 0.495                        | 0.282                      |
| P53 positive (%)                |                 | 684 | 24.5%                  | 27.5% | 28.5% | 0.704                        | 0.420                      |
| Intrinsic subtypes              | Luminal A       | 611 | 21.8%                  | 24.2% | 27.6% | 0.913                        | 0.831                      |
|                                 | Luminal B       |     | 47.2%                  | 44.2% | 43.3% |                              |                            |
|                                 | HER2 positive   |     | 26.1%                  | 26.9% | 26.1% |                              |                            |
|                                 | Triple negative |     | 4.9%                   | 4.8%  | 3.0%  |                              |                            |

**SNP: rs351855 in *FGFR4***

| Patient disease characteristics |                 | n   | Phenotype per genotype |       |       | P, three groups <sup>†</sup> | P, two groups <sup>‡</sup> |
|---------------------------------|-----------------|-----|------------------------|-------|-------|------------------------------|----------------------------|
|                                 |                 |     | AA                     | AB    | BB    |                              |                            |
| Genotype(number of patients)    |                 | 747 | 205                    | 404   | 138   |                              |                            |
| Clinic stage(UICC)              | 0               | 675 | 4.3%                   | 4.7%  | 3.2%  | 0.702                        | 0.669                      |
|                                 | 1               |     | 47.9%                  | 43.8% | 41.1% |                              |                            |
|                                 | 2               |     | 29.3%                  | 30.9% | 29.0% |                              |                            |
|                                 | 3-4             |     | 18.6%                  | 20.7% | 26.6% |                              |                            |
| Tumor size(cm)                  | ≤2              | 671 | 87.7%                  | 86.9% | 85.5% | 0.850                        | 0.697                      |
|                                 | >2              |     | 12.3%                  | 13.1% | 14.5% |                              |                            |
| Bloom-Richardson grade          | 1               | 566 | 8.3%                   | 7.6%  | 4.8%  | 0.510                        | 0.536                      |
|                                 | 2               |     | 68.2%                  | 71.1% | 78.1% |                              |                            |
|                                 | 3               |     | 23.6%                  | 21.4% | 17.1% |                              |                            |
| LN involvement (%)              |                 | 719 | 33.3%                  | 41.9% | 49.6% | 0.011                        | 0.010                      |
| ER positive (%)                 |                 | 691 | 63.0%                  | 65.7% | 64.3% | 0.817                        | 0.569                      |
| PR positive (%)                 |                 | 691 | 52.1%                  | 53.4% | 57.9% | 0.570                        | 0.567                      |
| HER2 positive (%)               |                 | 611 | 19.7%                  | 17.9% | 24.1% | 0.369                        | 0.945                      |
| Ki67 positive (%)               |                 | 686 | 57.4%                  | 63.6% | 66.4% | 0.209                        | 0.093                      |
| P53 positive (%)                |                 | 684 | 26.8%                  | 27.0% | 27.4% | 0.994                        | 0.940                      |
| Intrinsic subtypes              | Luminal A       | 611 | 21.4%                  | 25.5% | 25.9% | 0.694                        | 0.309                      |
|                                 | Luminal B       |     | 47.4%                  | 43.6% | 43.5% |                              |                            |
|                                 | HER2 positive   |     | 24.9%                  | 27.0% | 27.8% |                              |                            |
|                                 | Triple negative |     | 6.4%                   | 3.9%  | 2.8%  |                              |                            |

Note: LN: lymph node, ER: estrogen receptor, PR: progesterone receptor, HER2: human epidermal growth factor receptor2.

A: major allele; B: minor allele.

<sup>†</sup>Comparing the three genotype groups separately.

‡A codominant model, comparing the group of homozygous patients for the major allele with the combined group of heterozygous patients and patients homozygous for the minor allele.
